# Supplementary material for: Generation of human haploid neural stem cells from parthenogenetic embryonic stem cells
Source: Research Square preprint supplement (doi:10.21203/rs.3.rs-2332761/v1), 2022-12-07
Supplement: Supplementary file 1 [file b0d4a25edab0aa74852f3666.docx]

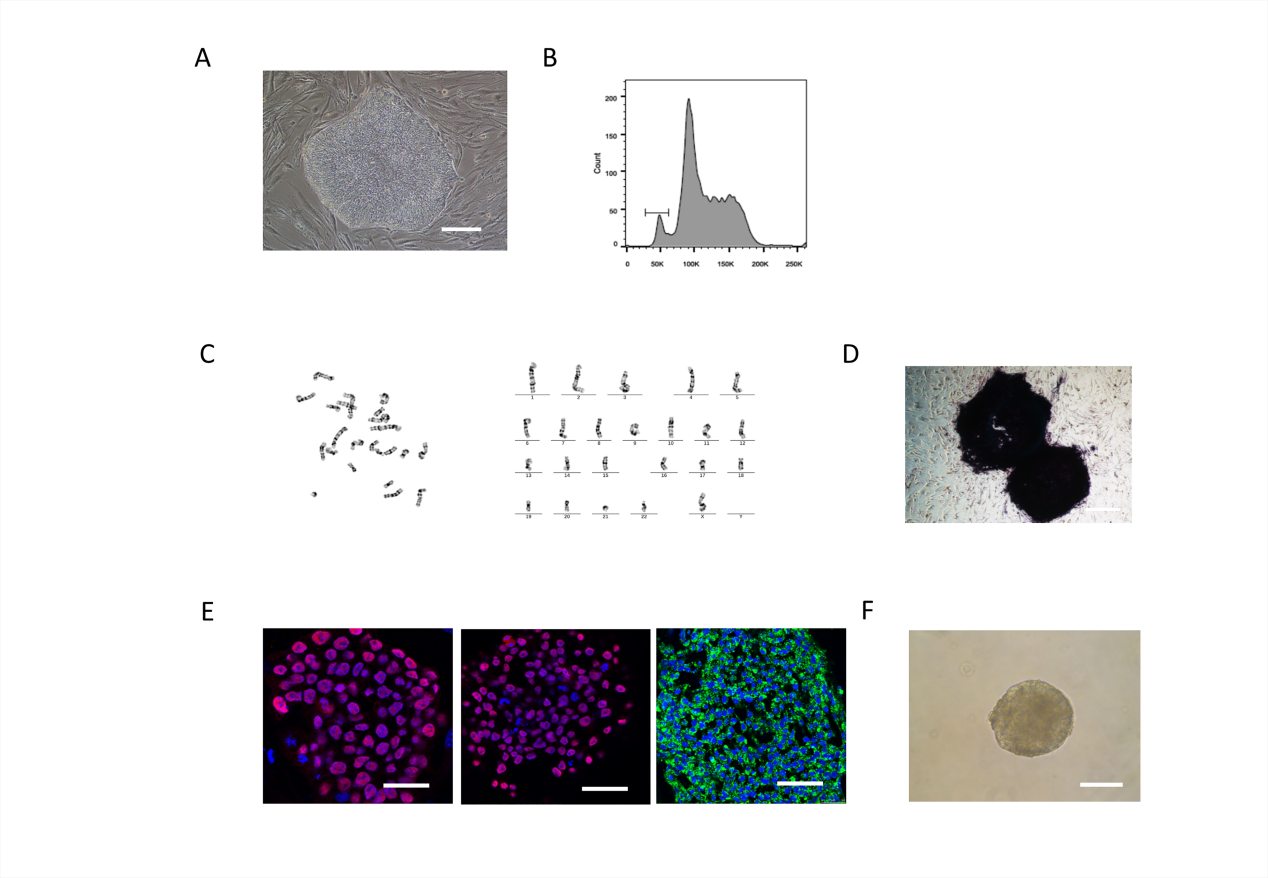


**Figure S1. Identification the pluripotency and haploidy of the human haploid ESCs**:hPGES1

1. The morphology of human traditional haploid ESCs. Scale bar, 100μm.
2. FACS analysis of DNA content of the human haESC line HPGES1 cultured in traditional medium after six weeks without sorting.
3. G-band analysis of HPGES1 cell line cultured in traditional medium with a haploid 23 chromosome set .
4. Alkaline phosphatase (AP) staining of human haESC line HPGES1 cultured in traditional medium. Scale bar, 200μm.
5. Immunofluorescence analysis of primate ESC markers in human haESCs cultured in traditional medium, including Oct4 (red), Nanog (red), SSEA4 (green). DAPI (blue) was used for staining of nuclei. Scale bar, 100 μm.
6. The morphology of embryoid bodies (EBs) from haploid-enriched cells cultured in traditional medium. Scale bar, 100 μm.


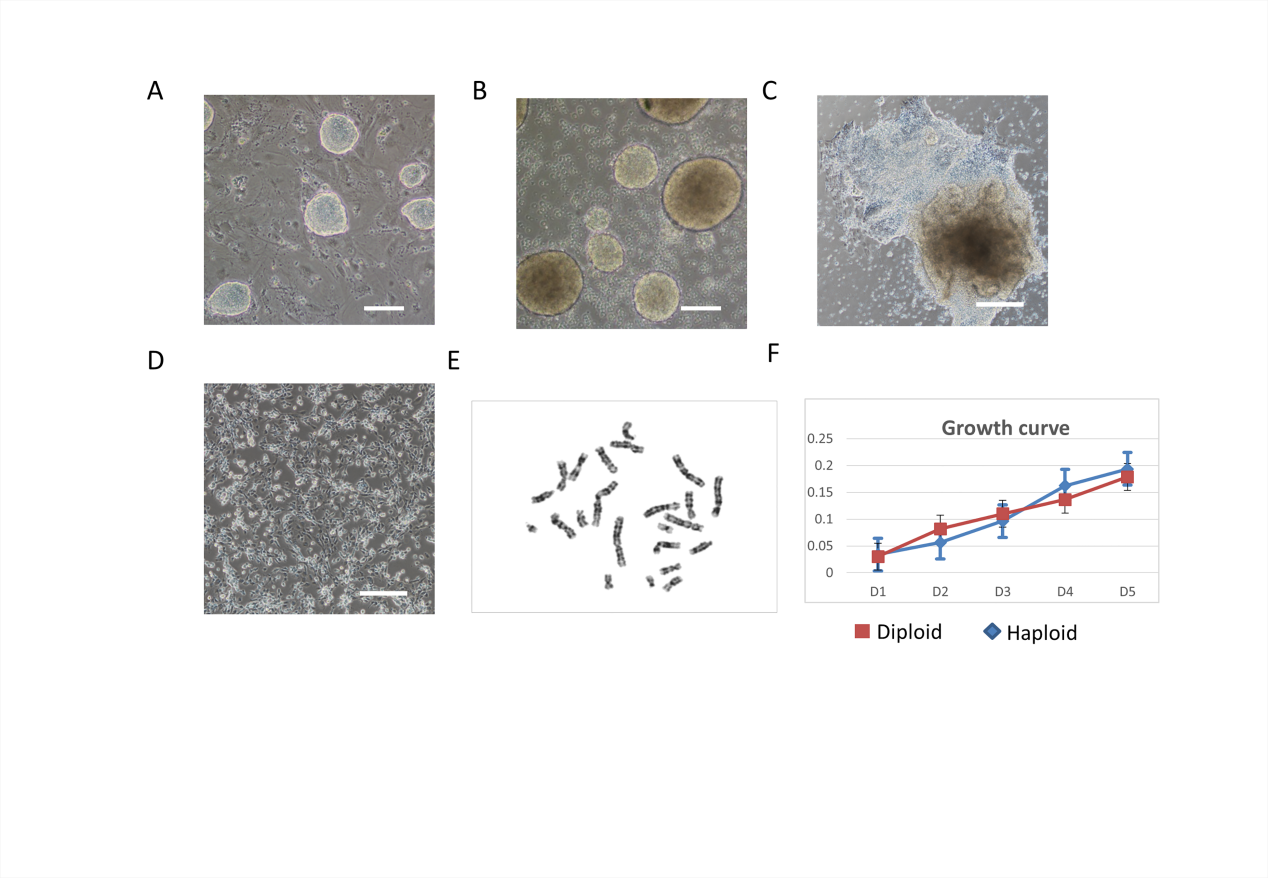


**Figure S2. Human haNSCs are derived from extended pluripotent haESCs**

(A) Well-formed human EXhaESCs. Scale bar, 100μm.

(B) Well-formed EBs from human EXhaESCs. Scale bar, 100μm.

(C) The morphology of rosettes which were manually selected and expanded in NSC medium. Scale bar, 100μm.

(D)The morphology of haNSCs before sorting. Scale bar, 200μm.

(E) Karyotype analysis diagram of haNSCs

(F) The growth curve of haNSCs and diploid NSCs. (t-test, n=5, *p < 0.05, **p < 0.01).

**
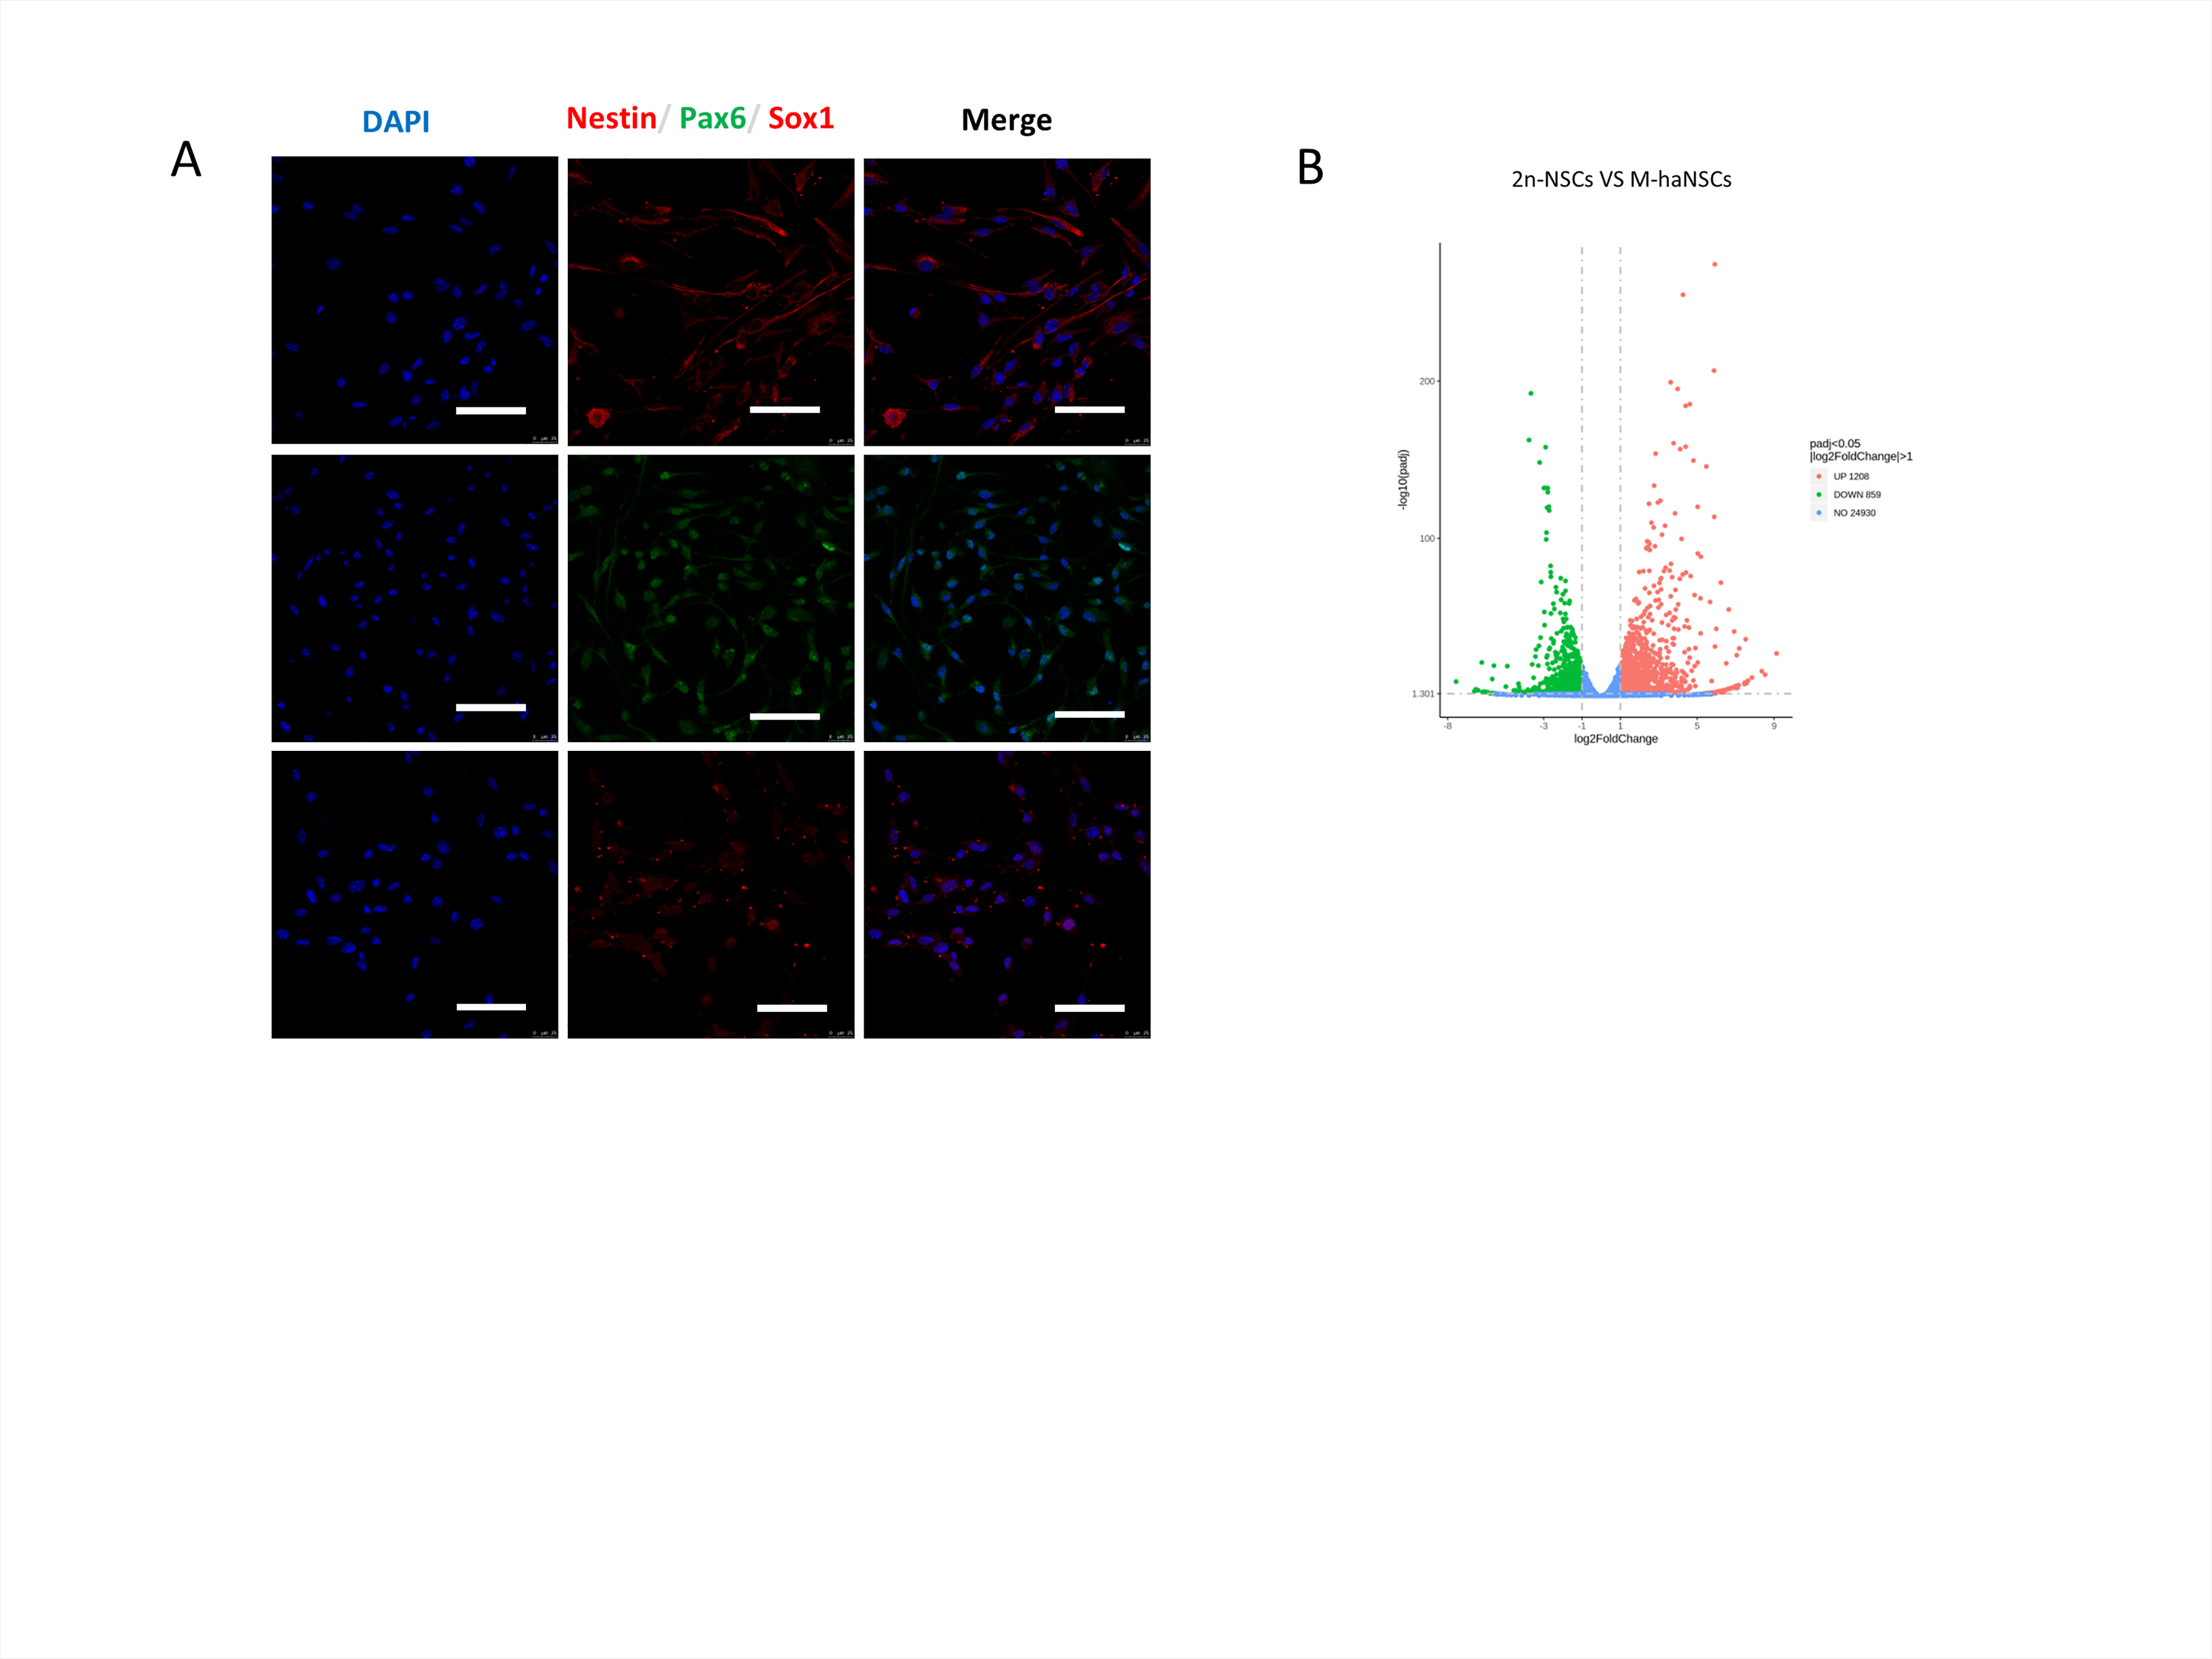
**

**Figure S3. Derived haNSCs are multipotency to neural subtypes in vitro**

1. Immuno-staining of NSC-specific markers in diploid ESC-derived NSCs. Nestin (red), Pax6 (green) and Sox1 (red). DAPI (blue) was used for staining of nuclei. Scale bar, 50μm.
2. Volcano analysis showed that the transcriptome profile of monolayer culture haploid NSCs (M-haNSCs) was highly similar to its diploid NSCs (2n-NSCs) counterparts.


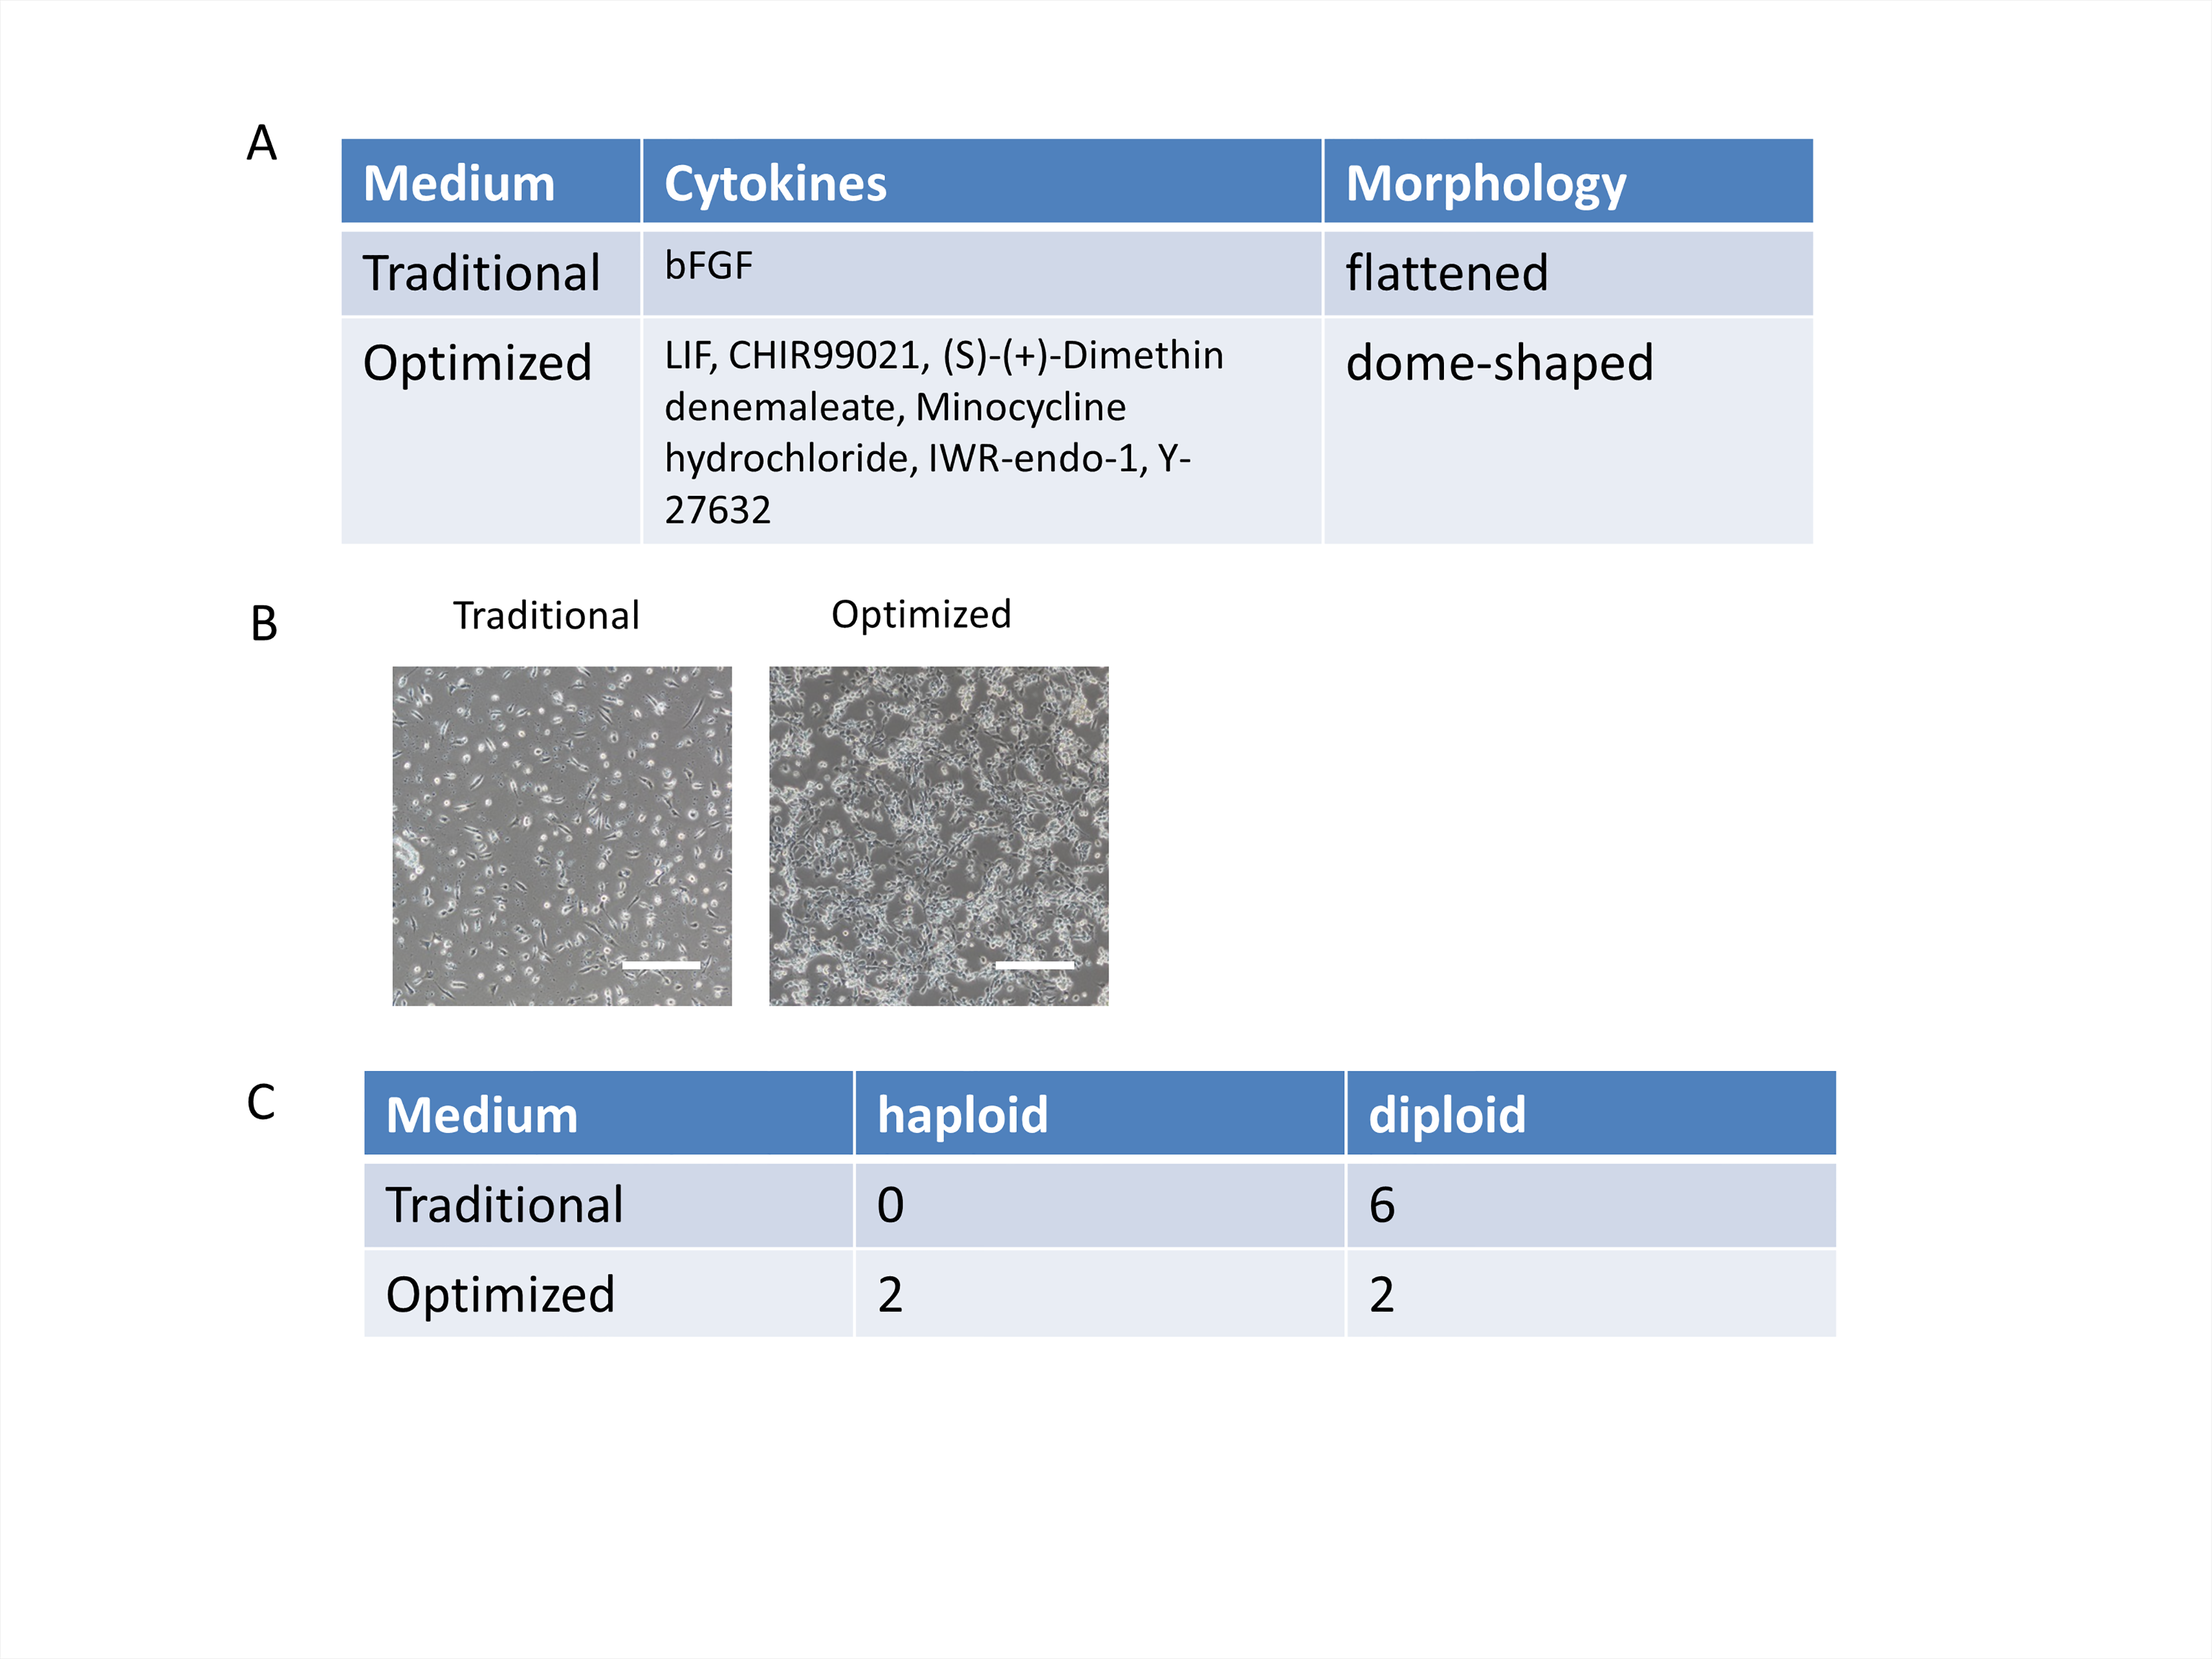


**Figure S4. Better puripotency yielded higher efficiency of neural differentiation in human haESCs**

1. Summary of contents and characteristics of human haESCs in optimized and traditional medium.
2. Morphology of sorted haNSCs from traditional group(left) and optimized group(right). Scale bar, 100 μm.
3. Statistics of haNSCs obtained from haESCs cultured in different systems (traditional and optimized).


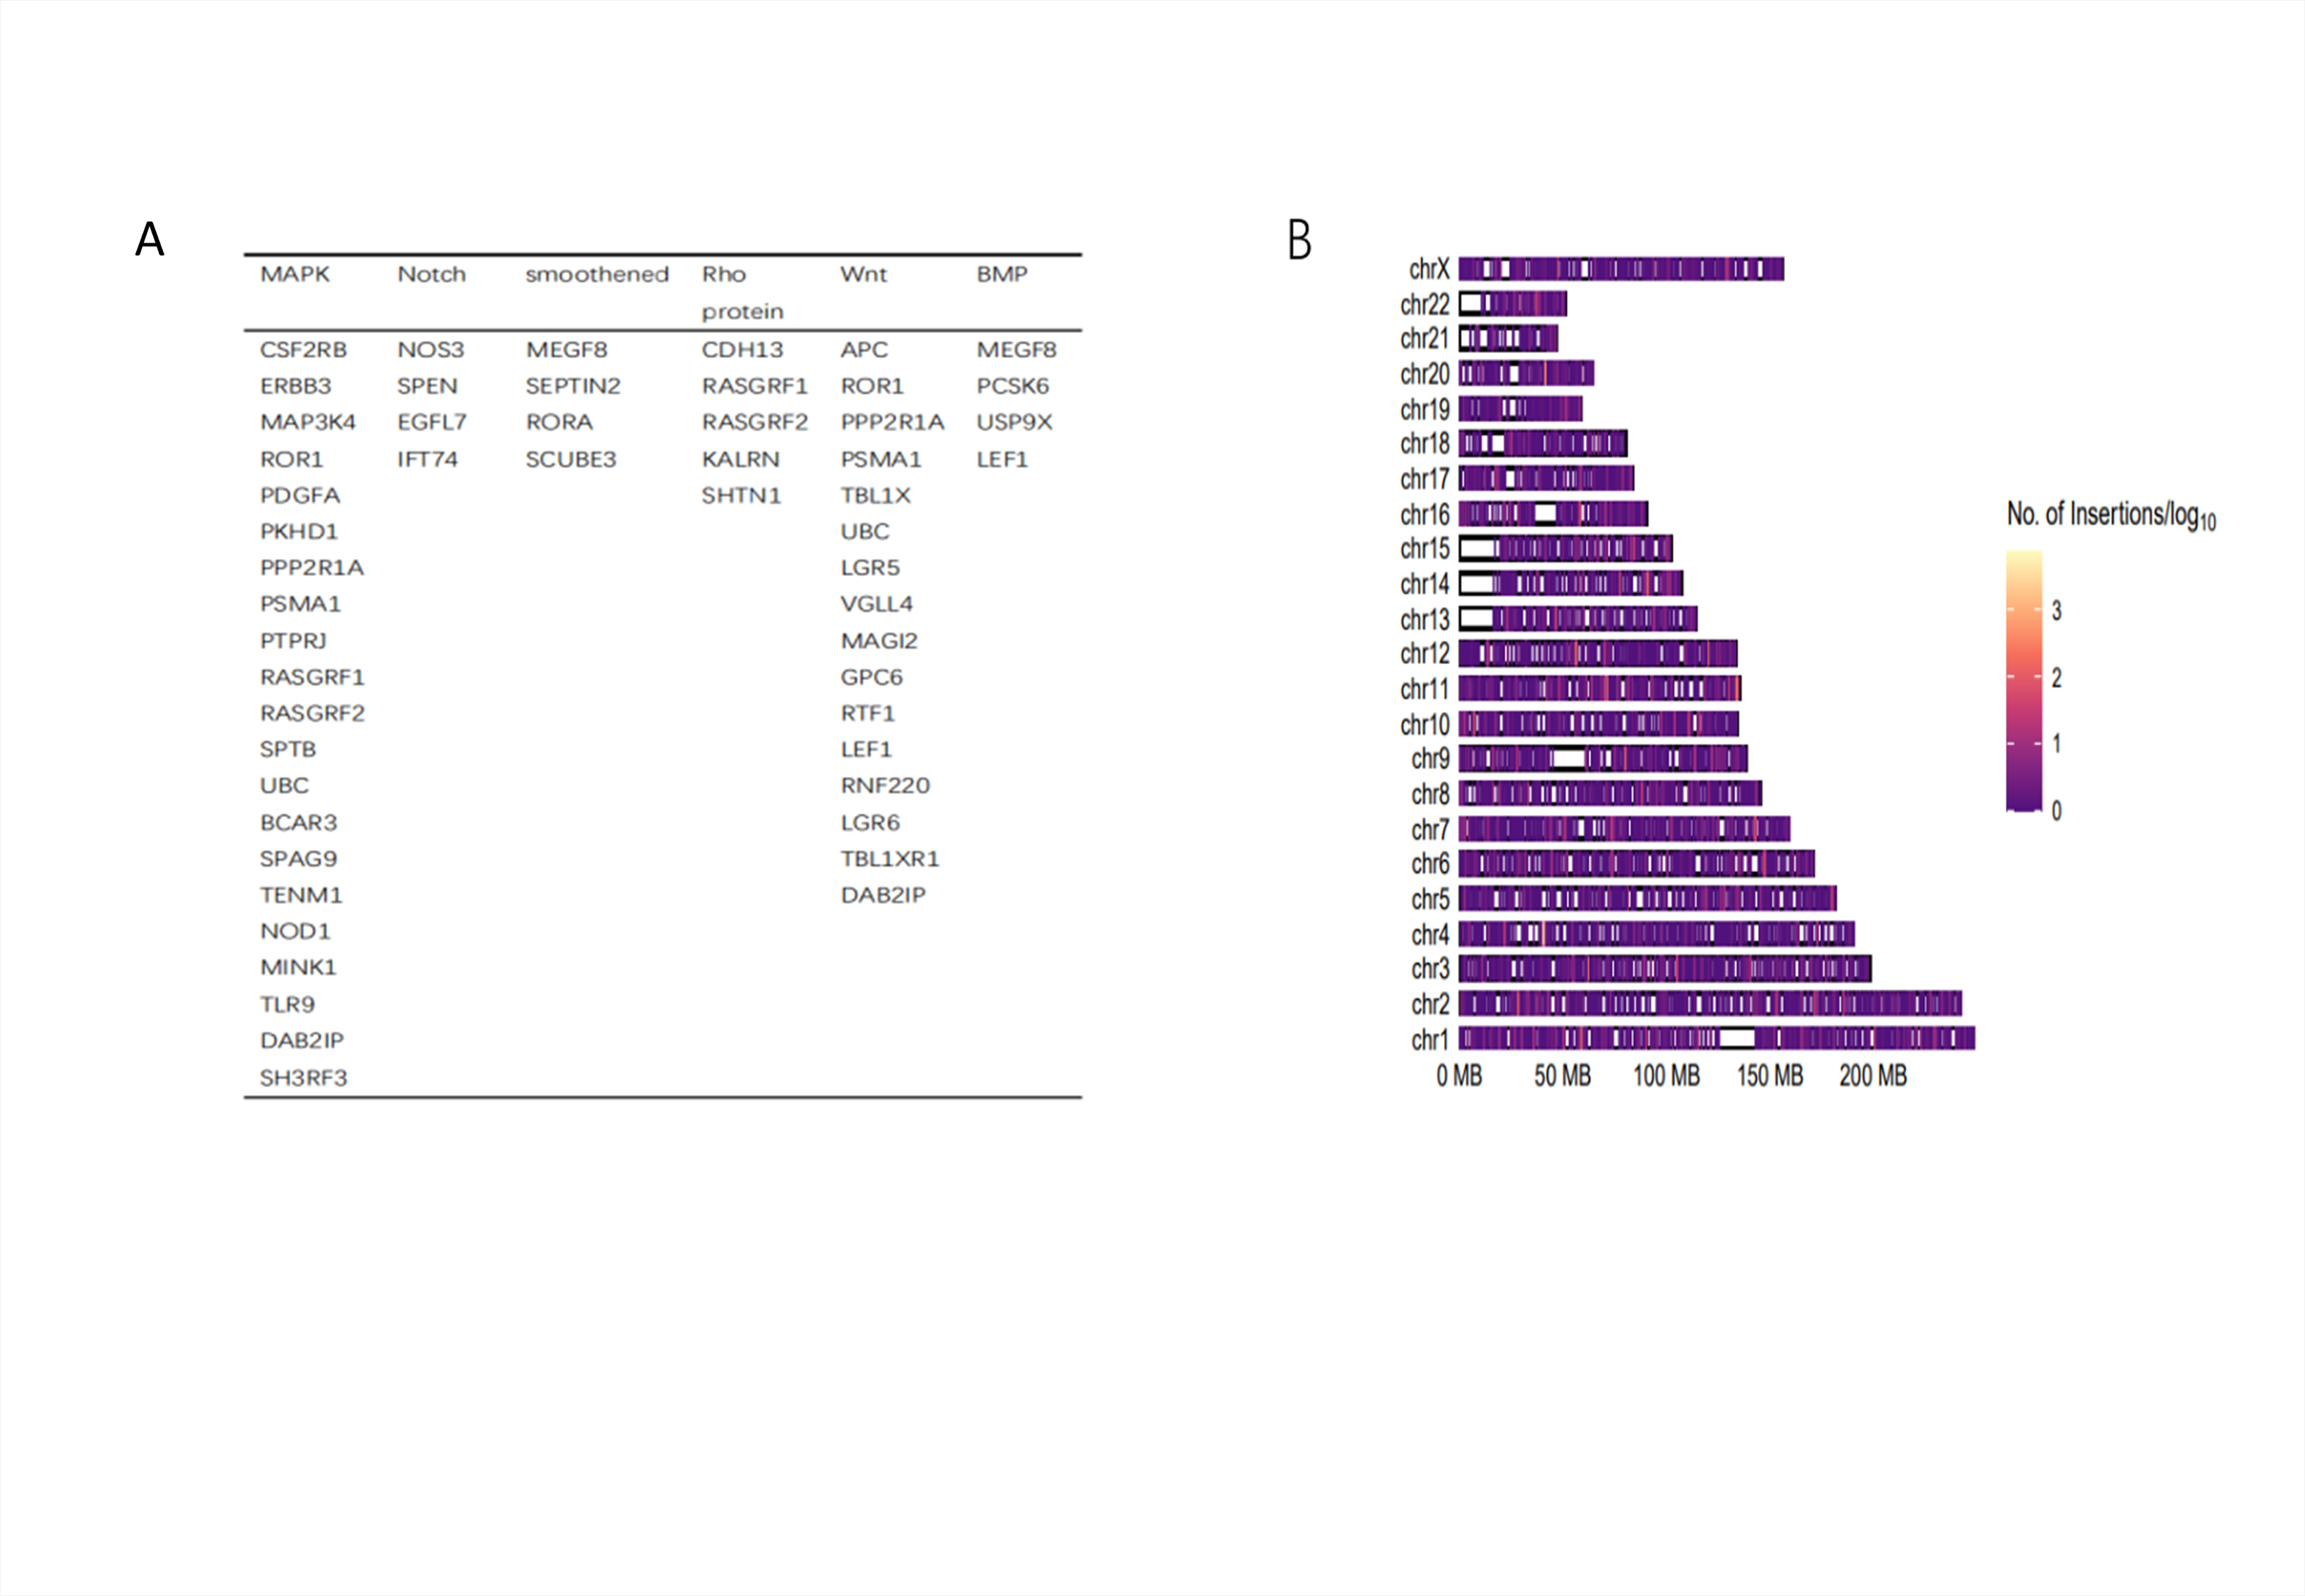


**Figure S5. Bioinformatics analysis of insertion sites in the mutant treated with Mncl2.**

1. Summary of trapped genes mapped to critical pathways related to neurotoxicity.
2. The hits across the whole genome.

**Tab. S1. Comparison of “optimized” and “traditional” human haESCs from the following three aspects: maintenance of haploidy, differentiation capacity and survival rate.**

| Group | DNA content after  6 weeks without  sorting (percentage  of haploid cells) | EB numbers | Area ratio of  rosette | percentage  of survived cells |
| --- | --- | --- | --- | --- |
| Repeats* | 1 2 3 | 1 2 3 | 1 2 3 | 1 2 3 |
| Optimized | 58.6 53.3 49.8 | 29 33 41 | 2.9 3.3 2.5 | 80.3 79.1 77.6 |
| Traditional | 23.4 33.6 19.8 | 18 22 17 | 1 1 1 | 44.5 51.3 55.6 |

*: All experiments were performed in triplicate.

**Tab. S2. Single haNSCs sphere are multipotency to neural subtypes in vitro**

| Cell types | Oigodendrocytes | Astrocytes | Neurons |
| --- | --- | --- | --- |
| Repeats* | 1 2 3 | 1 2 3 | 1 2 3 |
| Percentage of positive  cells (%) | 33.3 26.5 19.3 | 28.5 23.8 21.7 | 9.8 13.1 11.6 |

*: Each repetition means that a single haNSC sphere was randomly selected for differentiation.

**Tab. S3 Primers used in this work.**

| **Name** | **Sequence** |
| --- | --- |
| Gapdh Forward | AATCCCATCACCATCTTCCAGGAG |
| Gapdh Reverse | AATCCCATCACCATCTTCCAGGAG |
| Sox1 Forward | CAACCAGGACCGGGTCAAACG |
| Sox1 Reverse | GCCTCGGACATGACCTTCCACT |
| Nestin Forward | CTGCTACCCTTGAGACACCTG |
| Nestin Reverse | GGGCTCTGATCTCTGCATCTAC |
| Pax6 Forward | GTACTGAATGACTCAACTGCTCGG |
| Pax6 Reverse | CTTTAGAAGGAAGCGACACTCTGC |
| LEFT-L-1 | CCTCGATATACAGACCGATAAAACA |
| LEFT-R-1 | CAAGGCCTACTAGTATTATGCCCAGT |
| LEFT-L-2 | CATGATTATCTTTAACGTACGTCACAAT |
| LEFT-R-2 | GTACATGACCTTATGGGACTTTCCTAC |
| RIGHT-L-1 | GGTCATAGGGCCGGGATTC |
| RIGHT-R-1 | GACTGAGATGTCCTAAATGCACAGC |
| RIGHT-L-2 | TCTCCTCCACGTCACCGC |
| RIGHT-R-2 | GAGCAATATTTCAAGAATGCATGCGTC |
| SPLNK-GATC-TOP | GATCCCACTAGTGTCGACACCAGTCTCTAATTTTTTTT  TTCAAAAAAA |
| SPLNK-BOT | CGAAGAGTAACCGTTGCTAGGAGAGACCGTGGCTGA  ATGAGACTGGTGTCGACACTAGTGG |
